# Supplementary material
Source: PubMed Central journal article supplement (PMC2877384)
Supplement: NIHMS166293-supplement-2.pdf [file NIHMS166293-supplement-2.pdf]

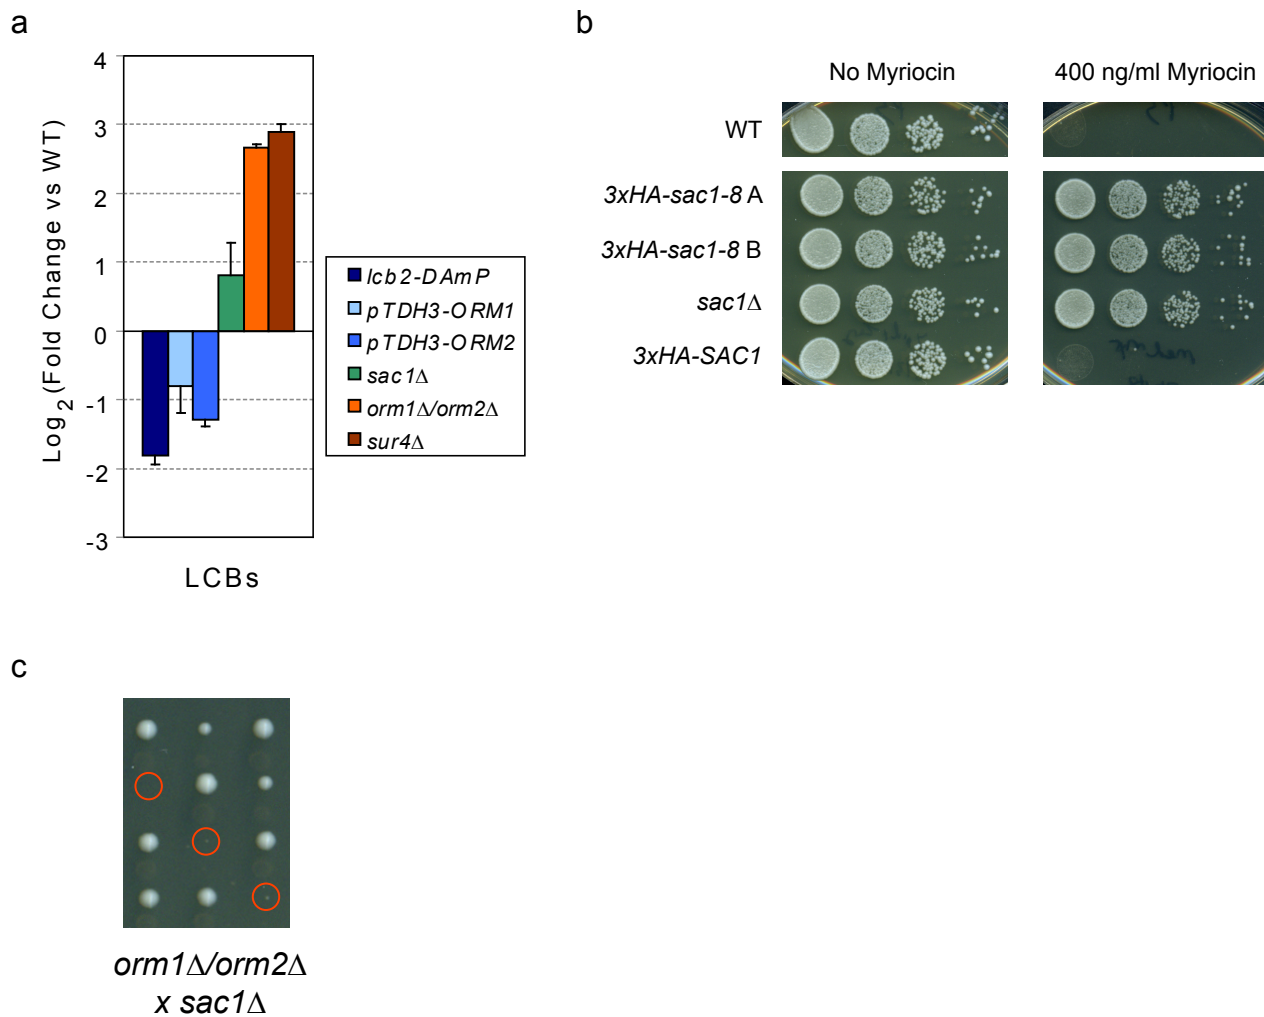

**Supplementary Figure 1. A functional role for Sac1 in sphingolipid metabolism.**

**a**, Lipidomic analysis of LCB levels in the indicated strains are shown (average  $\pm$  s.d.,  $n = 3$ ). **b**, Serial ten-fold dilutions of the indicated strains were spotted on plates with 0 or 400 ng/ml myriocin and imaged after 24-48 hr of growth. The *sac1-8* allele of *SAC1* is a catalytically inactive *SAC1* mutant described previously<sup>1</sup>. **c**, *ORM1/ORM2* and *SAC1* deletion mutants exhibit synthetic lethality. Representative tetrads from a *orm1Δ/orm2Δ x sac1Δ* cross are shown, with circles indicating spores with the *orm1Δ/orm2Δ/sac1Δ* genotype that fail to grow.

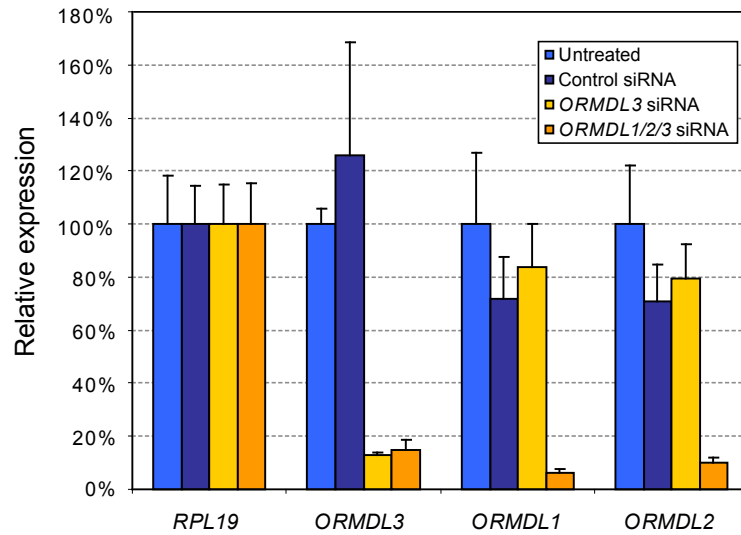

**Supplementary Figure 2. *ORMDL* gene expression after RNAi treatment**

Gene expression was quantified for the indicated genes after transfection of HeLa cells with siRNAs against the indicated genes. RT-PCR was performed with primers for the indicated genes using *RPL19* as a reference. Data are normalized to expression levels in untreated cells (average  $\pm$  s.d., n = 3).

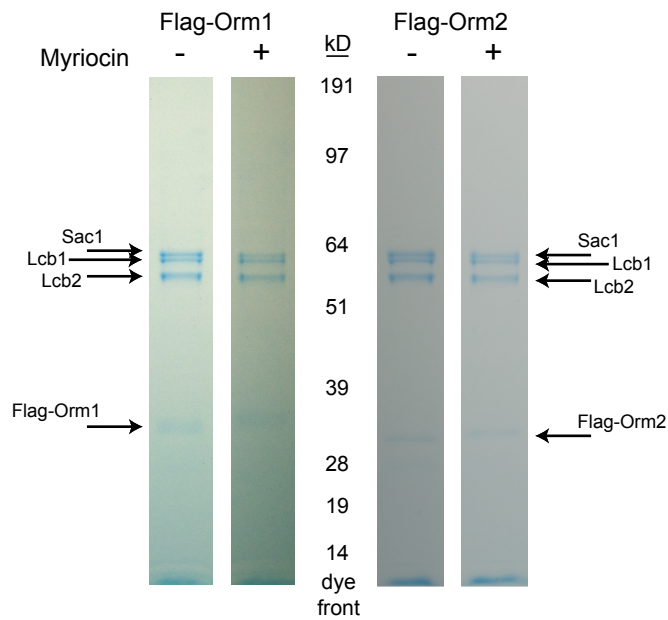

**Supplementary Figure 3. Myriocin treatment does not prevent formation of the Orm1/2-Lcb1/2-Sac1 complex.** Colloidal-stained SDS/PAGE gels are shown for native affinity purifications from strains expressing 3xFlag-Orm1 or 3xFlag-Orm2. Prior to harvest, the indicated strains were grown for 12-16 hr in standard rich media or media supplemented with 150 ng/ml myriocin.

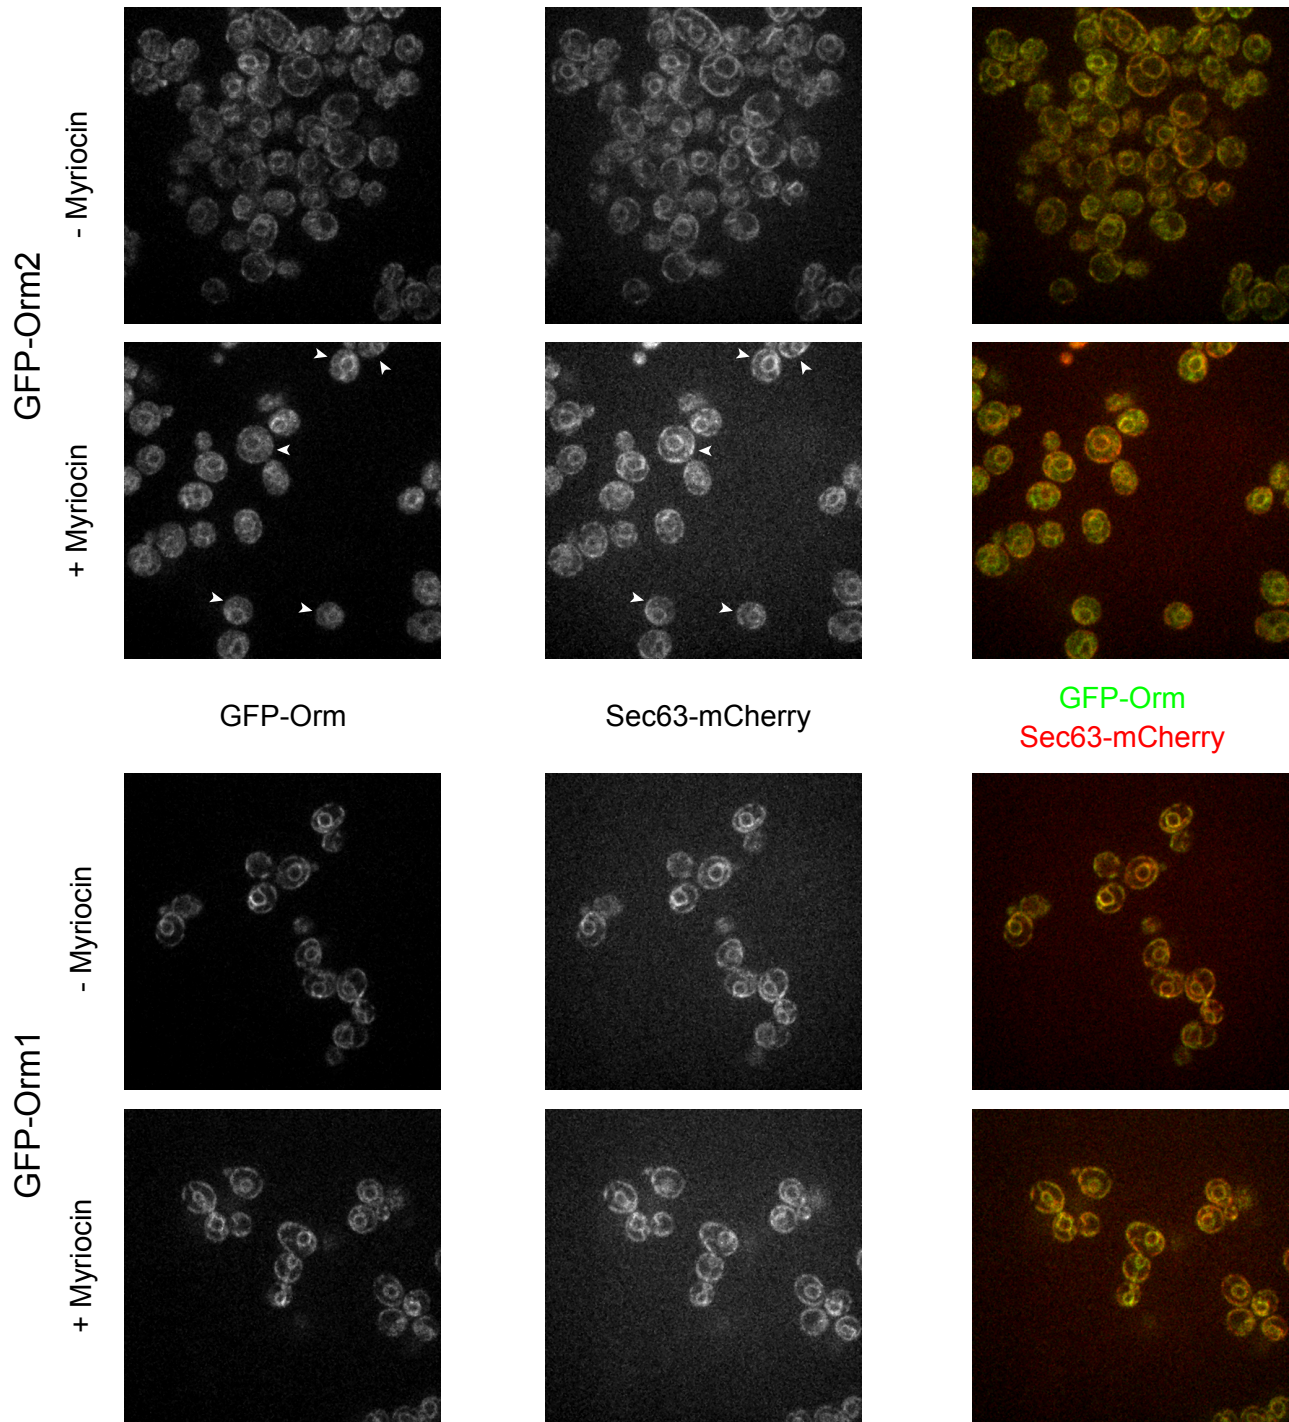

**Supplementary Figure 4. Orm2 localization changes in response to myriocin treatment.**

GFP-Orm2 and GFP-Orm1 were visualized in strains grown in rich media with or without myriocin. Sec63-mCherry was used as a marker for ER localization. Arrowheads in images of GFP-Orm2 indicate a reduction in cortical ER localization in response to myriocin treatment. Median filtering was applied to reduce image noise.

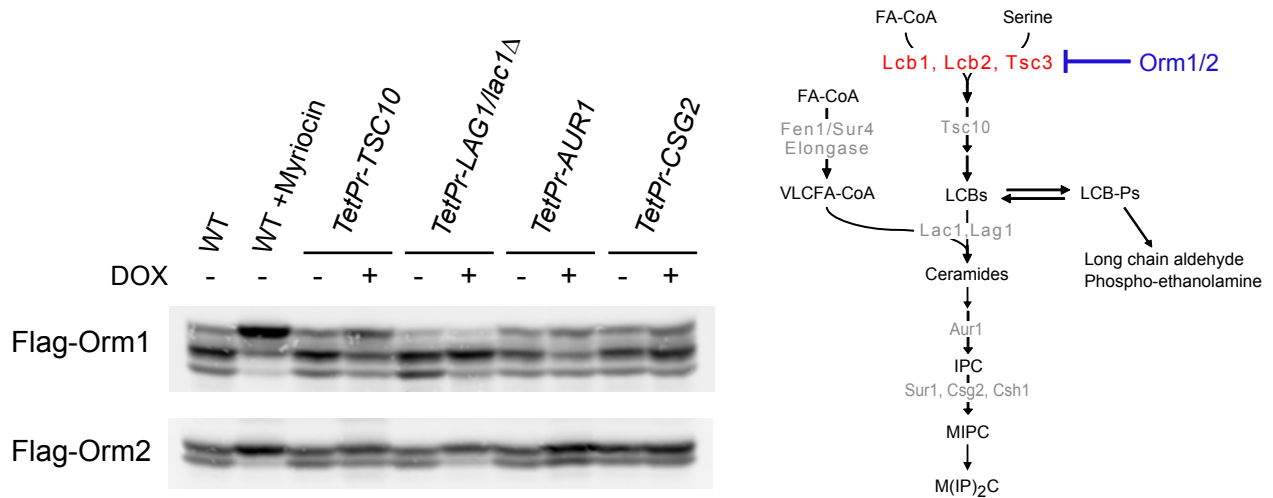

**Supplementary Figure 5. Disruptions to sphingolipid synthesis that act downstream of Lcb1/2 but upstream of Aur1 induce Orm1/2 phosphorylation.** Tetracycline-repressible promoters were inserted in front of the indicated genes in strains expressing 3xFlag-Orm1 or 3xFlag-Orm2 (note: *pTet-LAG1* was combined with deletion of *LAC1*). Lysates were prepared before and after gene expression shut-off (treatment with 5  $\mu$ g/ml doxycycline for 14-16 hr) and analyzed by Western blot against the Flag epitope after separation on phosphate-affinity SDS/PAGE gels. Note: gel-to-gel differences in banding pattern are due to variability in phosphate-affinity gel resolution.

Orm1

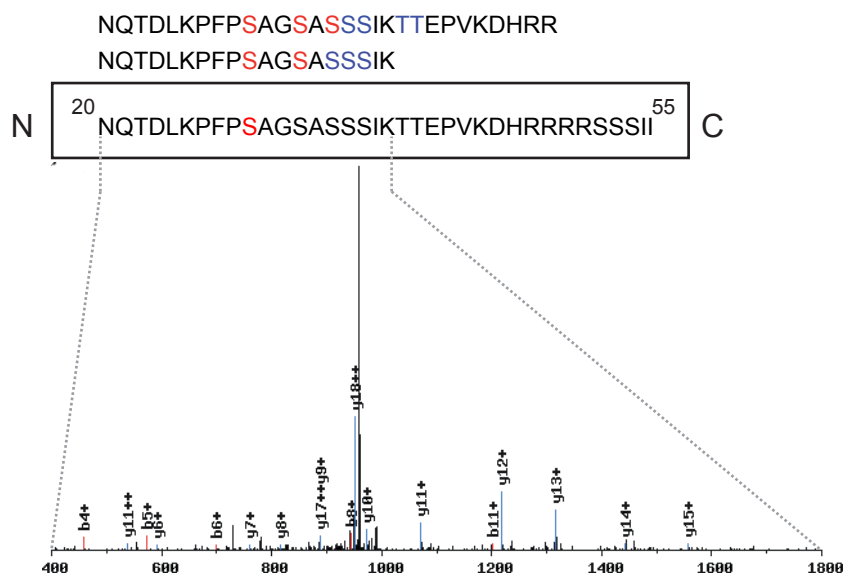

Orm2

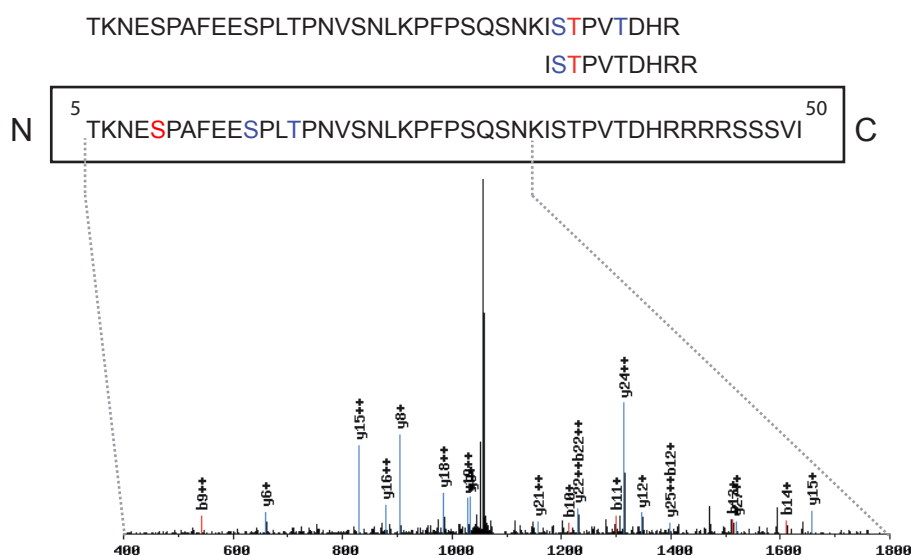

**Supplementary Figure 6. Mass spectrometry identifies phosphorylated residues on Orm1 and Orm2.** Phospho-peptides from immuno-precipitated 3xFlag-Orm1 and 3xFlag-Orm2 proteins were analyzed using an Orbitrap mass spectrometer. For both Orm1 and Orm2, three phospho-peptides were identified. All Orm2 phospho-peptides were singly phosphorylated, whereas singly, doubly and triply phosphorylated peptides were identified for Orm1. The most probable phosphorylation site assignments are highlighted in red, and alternative assignments (with a lower probability) are highlighted in blue. For the boxed peptides NQTDLKPFP\*AGSASSSIK (Orm1) and TKNES\*PAFEE SPLTPNVSNLKPFP SQSNK (Orm2), annotated tandem mass spectra are shown, where S\* indicates the site of phosphorylation.

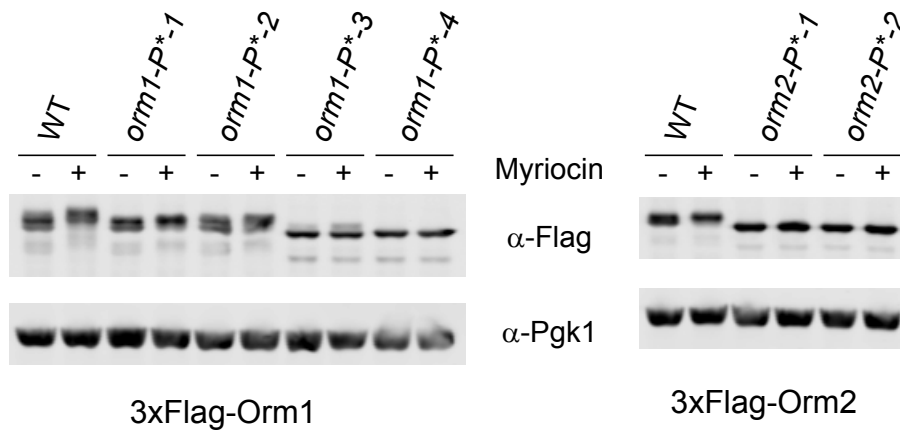

**Supplementary Figure 7. Wild type and phospho-mutant forms of Orm1 and Orm2 show similar expression levels.** Lysates from strains expressing 3xFlag-tagged wildtype (WT) or phospho-mutant alleles of *ORM1* and *ORM2* were prepared after growth for 12-16 hr in 0 or 150 ng/ml myriocin. Western blots of these lysates were probed against the Flag epitope and against Pgk1 as a loading control.





TCAAGTCAGAGGTGGCGAAACCCGACAGGACTATAAAGATAACCAGGCGTTTTCCCCCTGGAAGCTCCCTCGTGCGCTC  
TCCTGTTCCGACCCTGCCGCTTACCGGATACCTGTCCGCTTTTCTCCCTTCGGAAGCGTGGCGCTTTCTCAATGCT  
CACGCTGTAGGTATCTCAGTTCGGTGTAGGTGCTTCGCTCCAAGCTGGGCTGTGTGCACGAACCCCCCGTTTCAGCCC  
GACCGCTGCGCCTTATCCGGTAACTATCGTCTTGAGTCCAACCCGGTAAGACACGACTTATCGCCACTGGCAGCAGC  
CACTGGTAACAGGATTAGCAGAGCGAGGTATGTAGGCGGTGCTACAGAGTTCTTGAAGTGGTGGCCTAACTACGGCT  
ACACTAGAAGGACAGTATTTGGTATCTGCGCTCTGCTGAAGCCAGTTACCTTCGGAAAAAGAGTTGGTAGCTCTTGA  
TCCGGCAAACAACCACCGCTGGTAGCGGTGGTTTTTTTTGTTTGCAAGCAGCAGATTACGCGCAGAAAAAAGGATC  
TCAAGAAGATCCTTTGATCTTTTCTACGGGGTCTGACGCTCAGTGGAACGAAAACCTCACGTTAAGGGATTTTGGTCA  
TGAGATTATCAAAAAGGATCTTACCTAGATCCTTTTAAATTAATAAATGAAGTTTTAAATCAATCTAAAGTATATAT  
GAGTAACTTGGTCTGACAGTTACCAATGCTTAATCAGTGAGGCACCTATCTCAGCGATCTGTCTATTTTCGTTTCATC  
CATAGTTGCCTGACTCCCCGTGCTGTAGATAACTACGATACGGGAGGGCTTACCATCTGGCCCCAGTGCTGCAATGA  
TACCGCGAGACCCAGCTCACCGGCTCCAGATTTATCAGCAATAAACCCAGCCAGCCGGAAGGGCCGAGCGCAGAAGT  
GGTCTGCAACTTTATCCGCCTCCATCCAGTCTATTAATTGTTGCCGGGAAGCTAGAGTAAGTAGTTTCGCCAGTTAA  
TAGTTTTGCGCAACGTTGTTGCCATTGCTACAGGCATCGTGGTGTACGCTCGTCTGTTTGGTATGGCTTCATTTCAGCT  
CCGGTTCCCAACGATCAAGGCGAGTTACATGATCCCCATGTTGTGCAAAAAAGCGTTAGCTCCTTCGGTCTCCG  
ATCGTTGTGAGAAGTAAGTTGGCCGAGTGTATCACTCATGGTTATGGCAGCACTGCATAATTCTCTTACTGTCAT  
GCCATCCGTAAGATGCTTTTTCTGTGACTGGTGAGTACTCAACCAAGTCATTCTGAGAATAGTGTATGCGGCGACCGA  
GTTGCTCTTGGCCGGCGTCAATACGGGATAATACCGCGCCACATAGCAGAACTTTAAAAGTGCTCATCATTGGAAAA  
CGTTCTTCCGGGGCGAAAACCTCTCAAGGATCTTACCGCTGTTGAGATCCAGTTCGATGTAACCCACTCGTGCACCCAA  
CTGATCTTCAGCATCTTTTACTTTTACCAGCGTTTCTGGGTGAGCAAAAACAGGAAGGCAAAATGCCGCAAAAAAGG  
GAATAAGGGCGACACGGAAATGTTGAATACTCATACTCTTCTTTTTCAATATTATTGAAGCATTATCAGGGTTAT  
TGTCTCATGAGCGGATACATATTTGAATGTATTTAGAAAAATAAACAAATAGGGGTTCCGCGCACATTTCCCGAAA  
AGTGCCACCTGACGTCTAAGAAACCATTATTATCATGACATTAACCTATAAAAATAGGCGTATCACGAGGCCCTTTC  
GTCTCGCGCGTTTTCCGGTATGACGGTGAAAACCTCTGACACATGCAGCTCCCGGAGACGGTCCAGCTTGTCTGTAA  
GCGGATGCCGGGAGCAGACAAGCCCGTCAGGGCGCGTCAGCGGGTGTGGCGGGTGTGGGGCTGGCTTAACTATGC  
GGCATCAGAGCAGATTGACTGAGAGTGCACCATATGGACATATTGTCTGTTAGAACGGGCTACAATTAATACATAA  
CCTTATGTATCATACACATACGATTTAGGTGACACTATA

### pFA6a-NATMX4\_pTDH3\_eGFP\_Adh1-tm-AG

Primer annealing sequences used for PCR are underlined. TDH3 promoter sequence is in bold font.

GAACGCGGCCCGCCAGCTGAAGCTTCGTACGCTGCAGGTCGACGGATCCCCGGGTTAATTAAGGCGCGCCAGATCTGT  
TTAGCTTGCCTTGTCCCCGCCGGGTACCCGGCCAGCGACATGGAGGCCCAGAATACCCTCCTTGACAGTCTTGACG  
TGCGCAGCTCAGGGGCATGATGTGACTGTGCGCCGTACATTTAGCCCATACATCCCCATGTATAATCATTTGCATCC  
ATACATTTTGTAGTGGCCGACGGCGGAAGCAAAAATACGGCTCCTCGCTGCAGACCTGCGAGCAGGGAACCGCTCC  
CCTCACAGACGCGTTGAATTTGCTCCCCACGCCCGCCCTGTAGAGAAATATAAAAAGGTTAGGATTTGCCACTGAGGT  
TCTTCTTTTATATACTTCTTTTTAAAATCTTGCTAGGATACAGTTCTCACATCACATCCGAACATAAACAACCATGG  
GTACCCTCTTGACGACACGGCTTACCGGTACCGCACCAGTGTCCCGGGGACGCCGAGGCCATCGAGGCACTGGAT  
GGGTCTTACCACCGACACCGTCTTCCGCGTACCGCCACCGGGGACGGCTTACCCTGCGGGAGGTGCCGGTGGGA  
CCCCCCCCGACCAAGGTGTTCCCCGACGACGAATCGGACGACGAATCGGACGACGGGGAGGACGGCGACCCGGACT  
CCCCGACGTTCTGTCGCTACGGGACGACGGCGACCTGGCGGGCTTCTGTTGCTGCTCTGACTCCGGCTGGAACCGC  
CGGCTGACCGTTCGAGGACATCGAGGTGCCCCGGAGCACCGGGGGCACGGGTGCGGCGCGCTTGTGGGGCTCGC  
GACGGAGTTTCGCCCCGAGCGGGGCGCCGGGCACCTCTGGCTGGAGGTACCAACGTCAACGCACCGGCGATCCACG  
CGTACCGGCGGATGGGGTTACCCTCTGCGGCCTGGACACCGCCCTGTACGACGGCACCGCCTCGGACGGCGAGCAG  
GCGCTCTACATGAGCATGCCCTGCCCTAATCAGTACTGACAATAAAAAGATTCTTGTTTTTCAAGAACTTGTCAATTT  
GTATAGTTTTTTTTATATTGTAGTTGTTCTATTTTAAATCAAATGTTAGCGTGATTTATATTTTTTTTTCGCCTCGACAT  
CATCTGCCAGATGCGAAGTTAAGTGCAGAAAGTAATATCATGCGTCAATCGTATGTGAATGCTGGTCTGCTATAC  
TGCTGTGATTTCGATACTAACGCCGCCATCCAGTGTGAAAACGAGCTC**CACGCTTTTTTTCAGTTTCGAGTTTATCATT**  
**ATCAATACTGCCATTTCAAAGAATACGTAATAATTAATAGTAGTGATTTTCTTAACCTTTATTTAGTCAAAAAATTA**  
**GCCTTTTAAATCTGCTGTAACCCGTACATGCCAAAAATAGGGGGCGGGTTACACAGAATATATAACATCGTAGGTGT**  
**CTGGGTGAACAGTTTATCTGGCATCCACTAAATATAATGGAGCCCGCTTTTTAAGCTGGCATCCAGAAAAA**  
**GAATCCAGCACCAAAATATTGTTTTCTTACCAACCATCAGTTCATAGGTCCATTCTCTTAGCGCAACTACAGAGA**

ACAGGGGCACAAACAGGCCAAAAACGGGCACAACCTCAATGGAGTGATGCAACCTGCCTGGAGTAAATGATGACACA  
AGGCAATTGACCCACGCATGTATCTATCTCATTTCCTTACACCTTCTATTACCTTCTGCTCTCTCTGATTTGGAAAA  
AGCTGAAAAAAAAGGTTGAAACCAGTTCCCTGAAATTATCCCTACTTGGACTAATAAGTATATAAAGACGGTAGGT  
ATTGATTGTAATTCTGTAAATCTATTTCTTAAACTTCTTAAATTCTACTTTTATAGTTAGTCTTTTTTTTTAGTTTTA  
AAACACCAAGAACTTAGTTTTCGAATAAACACACATAAACAAACACTAGTACCATGAGTAAAGGAGAAGAACTTTTTCA  
CTGGAGTTGTCCCAATTCTTGTGTAATTAGATGGTGATGTTAATGGGCACAAATTTTCTGTCACTGGAGAGGGTAA  
GGTGATGCAACATACGGAAAACCTTACCCTTAAATTTATTTGCACTACTGGAAAACCTACCTGTTCCATGGCCAACACT  
TGTCACTACTTTCACTTATGGTGTTCAATGCTTTTCAAGATACCCAGATCATATGAAACGGCATGACTTTTTCAAGA  
GTGCCATGCCCCGAAGGTTATGTACAGGAAAGAACTATATTTTTCAAAGATGACGGGAACTACAAGACACGTGCTGAA  
GTCAAGTTTGAAGGTGATACCCTTGTTAATAGAATCGAGTTAAAAGGTATTGATTTTTAAAGAAGATGGAACATTCT  
TGGACACAAATTTGAATATAACTATAACTCACACAATGTATACATCATGGCAGACAAAACAAAAGAATGGAATCAAA  
TTAATTCAAAATTAGACACAACATTGAAGATGGAAGCGTTCAACTAGCAGACCATTATCAACAAAATACTCCAATT  
GGCGATGGCCCTGTCCTTTTACCAGACAACCATTACCTGTCCACACAATCTGCCCTTTTCGAAAGATCCAACGAAAA  
GAGAGACCACATGGTCCTTCTTGAGTTTGTAAACAGCTGCTGGGATTACACATGGCATGGATGAACTATACAAATAGG  
GCCTCGAGgccccgctattaacgcttttgtaatgtatagcttttaaatgtgtgatcgccgacttttgacgcccggccgg  
cggcagcgcgctgctccaggcagcgtcacggcgcaggtggcgggctgtgcgagctggcgcgactggcgcgactgtc  
gctgtcacgtgacggcgaccacgggtggagaaaaatTTTTggccaacggcgcgagagcagtcctcgacAACGAGCTC  
GAATTCATCGACCGCGGATCTGCCGGTCTCCCTATAGTGAGTCGTATTAATTTTCGATAAGCCAGGTTAACCTGCATT  
AATGAATCGGCCAACCGCGCGGGGAGAGGCGGTTTTGCGTATTGGGCGCTCTTCCGCTTCCCTCGCTCACTGACTCGCTG  
CGCTCGGTCGTTCCGCTGCGGCGAGCGGTATCAGCTCACTCAAAGGCGGTAATACGGTTATCCACAGAATCAGGGGA  
TAACGCAGGAAAGAATCATGTGAGCAAAAGGCCAGCAAAAGGCCAGGAACCGTAAAAAGGCCGCGTTGCTGGCGTTTT  
TCCATAGGCTCCGCCCCCTGACGAGCATCACAAAATCGACGCTCAAGTCAGAGGTGGCGAAACCCGACAGGACTA  
TAAAGATACCAGGCGTTTTCCCCCTGGAAGCTCCCTCGTGCGCTCTCCTGTTCCGACCCTGCCGCTTACCGGATACCT  
GTCCGCCTTTCTCCCTTCCGGAAGCGTGCGCTTTTCTCAATGCTCACGCTGTAGGTATCTCAGTTCGGTGTAGGTGCG  
TTCGCTCCAAGCTGGGCTGTGTGCACGAACCCCCCGTTCAGCCCCAGCCGCTGCGCCTTATCCGGTAACTATCGTCTT  
GAGTCCAACCCGGTAAGACACGACTTATCGCCACTGGCAGCAGCCACTGGTAACAGGATTAGCAGAGCGAGGTATGT  
AGGCGGTGCTACAGAGTTCTTGAAGTGGTGGCCTAACTACGGCTACACTAGAAGGACAGTATTTGGTATCTGCGCTC  
TGCTGAAGCCAGTTACCTTCGAAAAAAGAGTTGGTAGCTCTTGATCCGGCAAACAAACCACCGCTGGTAGCGGTGGT  
TTTTTTGTTTGAAGCAGAGATTACGCGCAGAAAAAAGGATCTCAAGAAGATCCTTTGATCTTTCTACGGGGTC  
TGACGCTCAGTGAACGAAAACCTCACGTTAAGGGATTTTGGTATGAGATTATCAAAAAGGATCTTACCTAGATCC  
TTTTAAATTAATAATGAAGTTTTAAATCAATCTAAAGTATATATGAGTAAACTTGGTCTGACAGTTACCAATGCTTA  
ATCAGTGAGGCACCTATCTCAGCGATCTGTCTATTTTCGTTTCATCCATAGTTGCCTGACTCCCCGTCGTGTAGATAAC  
TACGATACGGGAGGGCTTACCATCTGGCCCCAGTGCTGCAATGATACCCGCGAGACCCACGCTCACCGGCTCCAGATT  
TATCAGCAATAAACAGCCAGCCGGAAGGGCCGAGCGCAGAAGTGGTCTGCAACTTTATCCGCCTCCATCCAGTCT  
ATTAATTGTTGCCGGAAGCTAGAGTAAGTAGTTTCGCCAGTTAATAGTTTTCGCAACGTTGTTGCCATTGCTACAGG  
CATCGTGGTGTACGCTCGTCTGTTTGGTATGGCTTCATTACGCTCCGGTTCCCAACGATCAAGGCGAGTTACATGAT  
CCCCCATGTTGTGCAAAAAAGCGGTTAGCTCCTTCGGTCTCCGATCGTTGTGAGAAGTAAGTTGGCCGCGAGTTA  
TCACTCATGGTTATGGCAGCACTGCATAATTTCTTACTGTATGCCATCCGTAAGATGCTTTTTCTGTGACTGGTGA  
GTACTCAACCAAGTCATTCTGAGAATAGTGTATGCGGCGACCGAGTTGCTCTTGGCCGGCGTCAATACGGGATAATA  
CCGCGCCACATAGCAGAACTTTAAAAGTGCTCATCATTGAAAACGTTCTTCCGGGCGAAAACCTCTCAAGGATCTTA  
CCGCTGTTGAGATCCAGTTTCGATGTAACCCACTCGTGCACCCAACCTGATCTTTCAGCATCTTTTACTTTTACCAGCGT  
TTCTGGGTGAGCAAAAAACAGGAAGGCAAAATGCCGCAAAAAAGGGGAATAAGGGCGACACGGAAATGTTGAATACTCA  
TACTCTTCTTTTTCAATATTATTGAAGCATTATCAGGGTTATTGTCTCATGAGCGGATACATATTTGAATGTATT  
TAGAAAAATAACAAATAGGGGTTCCGCGCACATTTCCCCGAAAAGTGCCACCTGACGTCTAAGAAACCATTATTAT  
CATGACATTAACCTATAAAAAATAGGCGTATCACGAGGCCCTTTTCGTCTCGCGCGTTTTCCGGTATGACGGTGAAAACC  
TCTGACACATGCAGCTCCCGGAGACGGTCACAGCTTGTCTGTAAGCGGATGCCGGGAGCAGACAAGCCCGTCAGGGC  
GCGTCAGCGGGTGTGGCGGGTGTGCGGGCTGGCTTAACTATGCGGCATCAGAGCAGATTGTACTGAGAGTGCACCA  
TATGGACATATTGTCGTTAGAACGCGGCTACAATTAATACATAACCTTATGTATCATACACATACGATTTAGGTGAC  
ACTATA

### **pFA6a-NAT-MX4-Tet-Act-pTet**

A fusion PCR product of the pFA6a-NATMX4 marker, Tet-Activator, and 4XTet-Operator promoter was generated and cloned into the pCR2.1-TOPO vector

(Invitrogen). The sequence of the cloned PCR product is given below (NAT marker is underlined, TetO sites are in bold font):

GGTCGACGGATCCCCGGGTTAATTAAGGCGCGCCAGATCTGTTTTAGCTTGCCTCGTCCCCGCCGGGTACCCGGCCA  
GCGACATGGAGGCCAGAATACCCTCCTTGACAGTCTTGACGTGCGCAGCTCAGGGGCATGATGTGACTGTGCCCCG  
TACATTTAGCCATACATCCCATGTATAATCATTTCATCCATACATTTTGATGGCCGCACGGCGGAAGCAAAAA  
TTACGGCTCCTCGCTGCAGACCTGCGAGCAGGGAAACGCTCCCCTCACAGACGCGTTGAATTGTCCCCACGCCGCGC  
CCCTGTAGAGAAATATAAAAGGTTAGGATTTGCCACTGAGGTTCTTCTTTTCATATACTTCTTTTAAAATCTTGCTA  
GGATACAGTTCTCACATCACATCCGAACATAAAACAACCATGGGTACCCTCTTGACGACACGGCTTACCGGTACCGC  
ACCAGTGTCCCCGGGGACGCCGAGGCCATCGAGGCACTGGATGGGTCTTACCACCGACACCGTCTTCCGCGTCAC  
CGCCACCGGGACGGCTTACCCTGCGGGAGGTGCCGGTGACCCGCCCTGACCAAGGTGTTCCCCGACGACGAAT  
CGGACGACGAATCGGACGACGGGGAGGACGGCGACCCGGACTCCCGGACGTTCTGTCGCGTACGGGGACGACGGCGAC  
CTGGCGGGCTTCGTGGTCTGCTCTGTAATCCGGCTGGAACCGCCGGCTGACCGTCGAGGACATCGAGGTGCCCCGGA  
GCACCGGGGGACGGGGTTCGGGGCGCGGTTGATGGGGCTCGCGACGGAGTTTCGCCCGGAGCGGGGGCGCCGGGCACC  
TCTGGCTGGAGGTACCAACGTCAACGCACCGGCGATCCACGCGTACCGGCGGATGGGGTTCACCCTCTGCGGCCTG  
GACACCGCCCTGTACGACGGCACCGCCTCGGACGGCGAGCAGGCGCTCTACATGAGCATGCCCTGCCCTAATCAGT  
ACTGACAATAAAAAGATTCTTGTGTTTTCAAGAACTTGTCAATTTGTATAGTTTTTTTTATATTGTAGTTGTTCTATTTTA  
ATCAAATGTTAGCGTGATTTATATTTTTTTTTCGCCTCGACATCATCTGCCAGATGCGAAGTTAAGTGCAGAAAG  
TAATATCATGCGTCAATCGTATGTGAATGCTGGTTCGCTATACTGCTGTGATTTCGATACTAACGCCCCATCCAGTG  
TCGAAAACGAGCTCGAATTCtattacgatcctcgcgccccctaccaccgtaactcgtcaattccaagggcatcgg  
aaacatctgctcaaactcgaagtcggccatatccagagcgcgctagggggcggagtcgtggggggtaaatcccggac  
ccggggaatccccgtcccccaacatgtccagatcgaaatcgtctagcgcgctcggcatgcgccatcgccacgctcctcg  
ccgtctaagtgagctcgtccccaggctgacatcggtcggggggccgctcgacagctctgcgcgctgtgtcccgcggg  
gagaaaggacagggcgggagccgccagccccgcctcttcggggggcgtcgtcgtccgggagatcgagcagggccctcga  
tggtagaccgtaattgtttttcgtacgcgcgcggctgtacgcggaccactttcacatttaagttgtttttcta  
ccgcatatgatcaattcaaggccgaataagaaggctggctctgcacctgggtgatcaataaattcgatagcttgtcg  
taataatggcggcatactatcagtagtaggtgtttccctttcttcttttagcgacttgatgctcttgatcttccaata  
cgcaacctaaagtaaaatgccccacagcgcgtgagtgcatataatgacattctctagtgaaaaaccttgttggcataaa  
aaggctaattgatcttcgagagtttcatactgtttttctgtaggcgcgtgtacctaaatgacttttgcctccatcgcg  
atgacttagtaaaagcacatctaaaacttttagcgcttattacgtaaaaaatcttgccagctttcccccttctaagggc  
aaaagtgagtatggctcctatctaacatctcaatggctaaaggcgtcgagcaaagcccgtctattttttacatgcaa  
tacaatgtaggctgctctacacctagcttctggggcaggtttacgggttggttaaaccttcgattccgacctcattaag  
cagctctaattgcgctgtaatacactttacttttctaatctagacatatgaatttaattcGggggccgcggaggctgg  
atcgggtcccgggtgctcttctatggagggtcaaaacagcgtggatggcgtctccaggcgcgtctgacgggtcactaaacga  
gctctgcttatatagacctcccacgtaacgcctaccgcccatttgcgctcaatggggcgggagttggttacgacattt  
tggaaagtcccgttgatcttgggtgcaaaaacaaactccattgacgtcaatgggggtggagacttggaaatcccgtg  
agtcaaaaccgctatccacgcccattgatgtactgcaaaaaccgcatcaccatggtaatagegatgactaatacgtag  
atgtactgccaagtaggaaagtcccataaggtcatgtactgggcataatgccaggcggggccatttacgctcattgac  
gtcaatagggggcgtacttggcatatgatacacttgatgtactgccaagtgggcagtttagcgtaaaatactccacc  
attgacgtcaatggaaagtcctattggcgcttactatgggaacatacgtcatttatgacgtcaatgggcgggggtcg  
ttggggcgtcagccaggcggggccatttaccgtaagttatgtaacgcggaactccatataatgggctatgaactaatga  
ccccgtaattgattactattaataactagtcaataatcaatgtcaacatggcggtaatgtggacatgagccaatat  
aaatgtacatattatgatatggatacaacgtatgcaatgggccaagctcctcgagtaattcgcgccacttctaata  
agcgaatcttctatgatattatgatttttattattaataaagttataaaaaaaataagtgatatacaaaattttaagtg  
actcttaggttttaaaacgaaaattcttAttcttgagtaactctttcctgtaggtcagggtgctttctcaggatag  
TatgaggtegetcttattgaccacacctctaccggcAGATCCGCTAGGGATAACAGGGTAATATagatcaattctctc  
gatcgagtttaccact**ccctatcagtgatagagaaaagtgaaagtcgagtttaccactccctatcagtgatagagaa**  
**aagtgaaagtcgagtttaccactccctatcagtgatagagaaaagtgaaagtcgagtttaccactccctatcagtg**  
**tagagaaaagtgaaagtcgag**ctcggtaacctatggcatgcatgtgctctgtatgtatataaaactcttgtttctt  
cttttctctaaatattctttcttatacattaggtcctttgtagcataaattactatacttctatagacacgcaaac  
acaaatacacacactaaattaccggatcaattcggg**ATG**

pNTI8\_mCherry\_URA

Primer annealing sequences used for PCR are underlined. mCherry sequence used for C-terminal tagging is in bold font.

ATATCAGATCCACTAGTGGCCTATGCGGCCGCGGATCTGCCGGTCTCCCTATAGTGAGTCGTATTAATTTTCGATAAG  
CCAGGTTAACCTGCATTAATGAATCGGCCAACGCGCGGGGAGAGGCGGTTTTCGTATTGGGCGCTCTTCCGCTTCCT  
CGCTCACTGACTCGCTGCGCTCGGTCTGTTCCGGCTGCGGCGAGCGGTATCAGCTCACTCAAAGGCGGTAATACGGTTA  
TCCACAGAATCAGGGGATAACGCAGGAAAGAACATGTGAGCAAAAAGGCCAGCAAAAAGGCCAGGAACCGTAAAAAGGC  
CGCGTTGCTGGCGTTTTTCCATAGGCTCCGCCCCCTGACGAGCATCACAAAATCGACGCTCAAGTCAGAGGTGGC  
GAAACCCGACAGGACTATAAAGATAACCAGGCGTTTTCCCCCTGGAAGCTCCCTCGTGCGCTCTCCTGTTCCGACCCTG  
CCGCTTACCGGATACCTGTCCGCTTTTCTCCCTTCGGAAGCGTGGCGCTTTCTCAATGCTCACGCTGTAGGTATCT  
CAGTTCGGTGTAGGTGCTTCCGCTCCAAGCTGGGCTGTGTGCACGAACCCCCCGTTTCAGCCCGACCGCTGCGCCTTAT  
CCGGTAACTATCGTCTTGAGTCCAACCCGGTAAGACACGACTTATCGCCACTGGCAGCAGCCACTGGTAACAGGATT  
AGCAGAGCGAGGTATGTAGGCGGTGCTACAGAGTTCCTGAAGTGGTGGCCTAACTACGGCTACACTAGAAGGACAGT  
ATTTGGTATCTGCGCTCTGCTGAAGCCAGTTACCTTCGAAAAAGAGTTGGTAGCTCTTGATCCGGCAAACAAACCA  
CCGCTGGTAGCGGTGGTTTTTTTTGTTTGAAGCAGCAGATTACGCGCAGAAAAAAGGATCTCAAGAAGATCCTTTG  
ATCTTTTCTACGGGGTCTGACGCTCAGTGAACGAAAACCTCACGTTAAGGGATTTTGGTCATGAGATTATCAAAAAG  
GATCTTACCTAGATCCTTTTAAATTAATAAATGAAGTTTTAAATCAATCTAAAGTATATATGAGTAAACTTGGTCTG  
ACAGTTACCAATGCTTAATCAGTGAGGCACCTATCTCAGCGATCTGTCTATTTTCGTTTCATCCATAGTTGCCTGACTC  
CCCGTCTGTAGATAACTACGATACGGGAGGGCTTACCATCTGGCCCCAGTGCTGCAATGATACCGCGAGACCCACG  
CTCACCGGCTCCAGATTTATCAGCAATAAACAGCCAGCCGGAAGGGCCGAGCGCAGAAGTGGTCTGCAACTTTAT  
CCGCCTCCATCCAGTCTATTAATTGTTGCCGGGAAGCTAGAGTAAGTAGTTCCGCCAGTTAATAGTTTGCGCAACGTT  
GTTGCCATTGCTACAGGCATCGTGGTGTACGCTCTGTGTTGGTATGGCTTCATTACGCTCCGCTTCCCAACGATC  
AAGGCGAGTTACATGATCCCCATGTTGTGCAAAAAAGCGGTTAGCTCCTTCGGTCCCGATCGTTGTGAGAGTA  
AGTTGGCCGCAAGTGTATCACTCATGGTTATGGCAGCACTGCATAATTCTCTTACTGTATGCCATCCGTAAGATGC  
TTTTCTGTGACTGGTGAGTACTCAACCAAGTCATTCTGAGAATAGTGTATGCGGCGACCGAGTTGCTCTTGGCCGGC  
GTCAATACGGGATAATACCGCGCCACATAGCAGAACCTTTAAAAGTGCTCATCATTGGAAAACGTTCTTTCGGGGCGAA  
AACTCTCAAGGATCTTACCGCTGTTGAGATCCAGTTCGATGTAACCCACTCGTGACCCCAACTGATCTTACGATCT  
TTTACTTTTACCAGCGTTTCTGGGTGAGCAAAAACAGGAAGGCAAAAATGCCGCAAAAAGGGAATAAGGGCGACACG  
GAAATGTTGAATACTCATACTCTTCTTTTTTCAATATTTATTGAAGCATTATCAGGGTTATTGTCTCATGAGCGGAT  
ACATATTTGAATGTATTTAGAAAAATAAACAAATAGGGGTTCCGCGCACATTTCCCCGAAAAGTGCCACCTGACGTC  
TAAGAAACCATTATTATCATGACATTAACCTATAAAAATAGGCGTATCACGAGGCCCTTTTCGTCTCGCGCGTTTTCGG  
TGATGACGGTGAAAACCTCTGACACATGCAGCTCCCGGAGACGGTCACAGCTTGTCTGTAAGCGGATGCCGGGAGCA  
GACAAGCCCGTCAGGGCGCGTCAAGCGGTGTTGGCGGGTGTGCGGGCTGGCTTAACTATGCGGCATCAGAGCAGATT  
GTACTGAGAGTGCACCATATGGACATATTGTGCTTAGAACGCGGCTACAATTAATACATAACCTTATGTATCATACA  
CATACGATTTAGGTGACACTATAGAACGCGGCCGCGCCAGCTGAAGCTTTCGTACGCTGCAGGTGCGAGGATCGGTGACG  
GTGCTGGTTTAAATTAACATG**GTGAGCAAGGGCGAGGAGGATAACATGGCCATCATCAAGGAGTTCATGAGATTCAAG**  
**GTGCACATGGAGGGCTCCGTGAACGGCCACGAGTTCGAGATCGAGGGCGAGGGCGAGGGCAGACCCTACGAGGGCAC**  
**CCAGACCGCAAGCTGAAGGTGACCAAGGTGGCCCCCTGCCCTTCGCCTGGGACATCCTGTCCCCTCAGTTCATGT**  
**ACGGCTCCAAGGCCTACGTGAAGCACCCCGCGACATCCCCGACTACTGAAGCTGTCTTCCCCGAGGGCTTCAAG**  
**TGGGAGAGAGTGAAGTTCGAGGACGGCGGGTGGTACCGGTGACCCAGGACTCCTCCCTGCAGGACGGCGAGTT**  
**CATCTACAAGGTGAAGTTGAGAGGCACCAACTTCCCCTCCGACGGCCCCGTAATGCAGAAGAAGACCATGGGCTGGG**  
**AGGCCTCCTCCGAGAGAATGTACCCCGAGGACGGCGCCCTGAAGGGCGAGATCAAGCAGAGGCTGAAGCTGAAGGAC**  
**GGCGGCCACTACGACGCTGAGGTCAAGACCACCTACAAGGCCAAGAAGCCCGTGCAGCTGCCCGGCGCCTACAACGT**  
**CAACATCAAGTTGGACATCACCTCCCACAACGAGGACTACACCATTGTGGAACAATATGAAAAGAGCTGAAGGTAGAC**  
**ATTCTACTGGTGGTATGGATGAATTGTACAAA**TAA**GGCGCGCCACTTCTAAATAAGCGAATTTCTTATGATTTATGA**  
TTTTTATTATTAATAAGTTATAAAAAAATAAGTGTATACAAAATTTTAAAGTGACTCTTAGGTTTTTAAACGAAAA  
TTCTTATTCTTGAGTAACTCTTTCCTGTAGGTGAGTGTCTTCTCAGGTATAGTATGAGGTGCTCTTATTGACCA  
CACCTTACCAGGATCCGCTAGGGATAACAGGGTAATATAGATCTGTTTAGCTTGCCTCGTCCCCGCGGGTAC  
CCGGCCAGCGACATGGAGGCCAGAAATACCCTCCTTGACAGTCTTGACGTGCGCAGCTCAGGGGCATGATGTGACTG  
TCGCCCCGTACATTTAGCCCATACATCCCCATGTATAATCATTTGCATCCATACATTTTGTAGTGGCCGACGGCGCGAA  
GCAAAAATTACGGCTCCTCGCTGCAGACCTGCGAGCAGGAAACGCTCCCCTCACAGACGCGTTGAATTGTCCCCAC  
GCCGCGCCCCGTAGAGAAATATAAAAGGTTAGGATTTGCCACTGAGGTTCTTCTTTTCAATACTTCTTTTAAAT  
CTTGCTAGGATACAGTTCTCACATCACATCCGAACATAAACAACCATGACAGTCAACACTAAGACCTATAGTGAGAG  
AGCAGAAACTCATGCCTCACCAGTAGCACAGCGATTATTTTCGATTAATGGAACCTGAAGAAAACCAATTTATGTGCAT  
CAATTGACGTTGATACCACTAAGGAATTCCTTGAATTAATTGATAAATTAGGTCCTTATGTATGCTTAATCAAGACT  
CATATTGATATAATCAATGATTTTTTCTATGAATCCACTATTGAACCATTATTAGAATTTTACGTAACATCAATT

TATGATTTTTGAAGATAGAAAATTTGCTGATATTGGTAATACCGTAAAGAAACAATATATTGGTGGAGTTTATAAAA  
TTAGTAGTTGGGCAGATATTACCAATGCTCATGGTGTCACTGGGAATGGAGTGGTTGAAGGATTAACAGGGAGCT  
AAAGAAACCACCACCAACCAAGAGCCAAGAGGGTTATTGATGTTAGCTGAATTATCATCAGTGGGATCATTAGCATA  
TGGAGAATATTCTCAAAAAACTGTTGAAATTGCTAAATCCGATAAGGAATTTGTTATTGGATTTATTGCCCAACGTG  
ATATGGGTGGCCAAGAAGAAGGATTTGATTGGCTTATTATGACACCTGGAGTTGGATTAGATGATAAAGGTGATGGA  
TTAGGACAACAATATAGAACTGTTGATGAAGTTGTTAGCACTGGAAGTATGATATTATCATTGTTGGTAGAGGATTGTT  
TGGTAAAGGAAGAGATCCAGATATTGAAGGTAAAAGGTATAGAAATGCTGGTTGGAATGCTTATTTGAAAAAGACTG  
GCCAATTATAATCAGTACTGACAATAAAAAGATTCTTGTGTTTTCAAGAACTTGTCAATTTGTATAGTTTTTTTTATATTG  
TAGTTGTTCTATTTTAATCAAATGTTAGCGTGATTTATATTTTTTTTTCGCCTCGACATCATCTGCCCAGATGCGAAG  
TTAAGTGCGCAGAAAGTAATATCATGCGTCAATCGTATGTGAATGCTGGTCGCTATACTGCTGTGATTTCGATACTA  
ACGCCGCCATCCAGTGTCGAAAACGAGCTCGAATTCATCGATG

| Protein ID | <b>IP 3xFlag-Orm1</b> |                     | <b>IP 3xFlag-Orm2</b> |                     |
|------------|-----------------------|---------------------|-----------------------|---------------------|
|            | # of peptides         | % Sequence Coverage | # of peptides         | % Sequence Coverage |
| Sac1       | 42                    | 74.6                | 33                    | 62.1                |
| Lcb1       | 23                    | 40.9                | 26                    | 43.5                |
| Lcb2       | 23                    | 41.0                | 22                    | 37.1                |
| Orm1       | 10                    | 49.1                | 4                     | 19.4                |
| Orm2       | 6                     | 25.0                | 8                     | 31.9                |
| Tsc3       | 3                     | 30.0                | 1                     | 17.5                |

**Supplementary Table 1. Orm-associated proteins identified by mass spectrometry.**

Proteins found in immunoprecipitations of 3xFlag-Orm1 and 3xFlag-Orm2 were analyzed by mass spectrometry. Peptide coverage information for identified proteins corresponding to the bands indicated in **Fig. 2a** are shown above.

## Supplementary Notes

### References for Supplementary Information

1. Kearns, B. G. et al. Essential role for diacylglycerol in protein transport from the yeast Golgi complex. *Nature* 387, 101-5 (1997).
2. Gari, E., Piedrafita, L., Aldea, M. & Herrero, E. A set of vectors with a tetracycline-regulatable promoter system for modulated gene expression in *Saccharomyces cerevisiae*. *Yeast* 13, 837-48 (1997).
3. Shaner, N. C. et al. Improved monomeric red, orange and yellow fluorescent proteins derived from *Discosoma* sp. red fluorescent protein. *Nat Biotechnol* 22, 1567-72 (2004).
